# Supplementary material for: Branched-Chain Fatty Acids as Mediators of the Activation of Hepatic Peroxisome Proliferator-Activated Receptor Alpha by a Fungal Lipid Extract
Source: PubMed Central journal article supplement (PMC7565516; doi:10.3390/biom10091259), 2020-08-31
Supplement: biomolecules-10-01259-s001.pdf [file biomolecules-10-01259-s001.pdf]

## Supplementary Materials

# Branched-Chain Fatty Acids as Mediators of the Activation of Hepatic Peroxisome Proliferator-Activated Receptor Alpha by a Fungal Lipid Extract

Garima Maheshwari <sup>1,2</sup>, Robert Ringseis <sup>1,\*</sup>, Gaiping Wen <sup>1</sup>, Denise K. Gessner <sup>1</sup>, Johanna Rost <sup>2</sup>, Marco A. Fraatz <sup>2</sup>, Holger Zorn <sup>2,3</sup> and Klaus Eder <sup>1</sup>

<sup>1</sup> Institute of Animal Nutrition and Nutrition Physiology, Justus Liebig University Giessen, Heinrich-Buff-Ring 26-32, 35392 Giessen, Germany; Garima.Maheshwari@lcb.chemie.uni-giessen.de (G.M.); gaiping.wen@ernaehrung.uni-giessen.de (G.W.); denise.gessner@ernaehrung.uni-giessen.de (D.K.G.); Klaus.Eder@ernaehrung.uni-giessen.de (K.E.)

<sup>2</sup> Institute of Food Chemistry and Food Biotechnology, Justus Liebig University Giessen, Heinrich-Buff-Ring 17, 35392 Giessen, Germany; johanna.rost@gmx.de (J.R.); marco.fraatz@lcb.chemie.uni-giessen.de (M.A.F.); holger.zorn@lcb.chemie.uni-giessen.de (H.Z.)

<sup>3</sup> Fraunhofer Institute for Molecular Biology and Applied Ecology, Winchester Str. 2, 35394 Giessen, Germany

\* Correspondence: robert.ringseis@ernaehrung.uni-giessen.de; Tel.: +49-641-9939231

Received: 8 June 2020; Accepted: 28 August 2020; Published: date

### Supplementary Table S1

Characteristics of gene-specific primers used for qPCR analysis.

| Gene                   | Forward Primer (3'-5') | Reverse Primer (3'-5') | Product length (bp) | T <sub>m</sub> (°C) | NCBI GenBank |
|------------------------|------------------------|------------------------|---------------------|---------------------|--------------|
| <i>Reference genes</i> |                        |                        |                     |                     |              |
| ACTB                   | GACCTCTATGCCAACACAGT   | CACCAATCCACACAGAGTAC   | 154                 | 60                  | NM_031144    |
| ATP5B                  | GCACCGTCAGAACTATTGCT   | GAATTCAGGAGCCTCAGCAT   | 203                 | 60                  | NM_134364    |
| CANX                   | CCAGATGCAGATCTGAAGAC   | CTGGGTCCTCAATTTACGT    | 175                 | 60                  | NM_172008    |
| MDH1                   | CAGACAAAGAAGAGGTTGCC   | CGTCAGGCAGTTTGTATTGG   | 206                 | 60                  | NM_033235    |

|                     |                        |                        |     |    |           |
|---------------------|------------------------|------------------------|-----|----|-----------|
| RPL13               | CTTAAATTGGCCACGCAGCT   | CTTCTCAACGTCTTGCTCTG   | 198 | 60 | NM_031101 |
| TOP1                | GAAGAACGCTATCCAGAAGG   | GCTTTGGGACTCAGCTTCAT   | 137 | 60 | NM_022615 |
| <i>Target genes</i> |                        |                        |     |    |           |
| ACOX1               | CTGGGCTGAAGGCTTTTACT   | GCTGTCTGCAGCATCATAAC   | 172 | 60 | NM_017340 |
| CPT1A               | GCAAAGTGTCCGCAGACCT    | CATCTTCCATGCAGCAGGGA   | 170 | 60 | NM_031559 |
| CYP4A1              | CAGAATGGAGAATGGGGACAGC | TGAGAAGGGCAGGAATGAGTGG | 460 | 60 | NM_175837 |
| SLC22A5             | GAACTCACGAGCCTCGCACGC  | TCGTCTAGTCCCGCATGCC    | 117 | 60 | NM_019269 |

Abbreviations: ACTB, actin, beta; ATP5B, ATP synthase, H<sup>+</sup> transporting, mitochondrial F1 complex, beta polypeptide; CANX, calnexin; MDH1, malate dehydrogenase 1, NAD (soluble); RPL13, ribosomal protein 13; TOP1, topoisomerase (DNA) I; ACOX1, acyl-CoA oxidase; CPT1A, carnitine-palmitoyltransferase 1A; CYP4A1, cytochrome P450 4A1; SLC22A5, solute carrier family 22 (organic cation/carnitine transporter), member 5
